# Supplementary material for: Bacillus subtilis 26D Triggers Induced Systemic Resistance against Rhopalosiphum padi L. by Regulating the Expression of Genes AGO, DCL and microRNA in Bread Spring Wheat
Source: MDPI journal article supplement (doi:10.3390/microorganisms11122983), 2023-12-14
Supplement: s1 [file s1]

# ***B. subtilis* 26D Triggers Induced Systemic Resistance against *Rhopalosiphum padi* L. by Regulating the Expression of Genes *AGO*, *DCL* and microRNA in Bread Spring Wheat**

**Sergey D. Rumyantsev, Svetlana V. Veselova\*, Guzel F. Burkhanova, Valentin Y. Alekseev, Igor V. Maksimov**

Institute of Biochemistry and Genetics, Ufa Federal Research Centre, Russian Academy of Sciences, Prospekt Oktyabrya, 71, 450054 Ufa, Russia; rumyantsev-serg@mail.ru (S.D.R.); guzel\_mur@mail.ru (G.F.B.); valentin-1994@yandex.ru (V.Y.A.); igor.mak2011@yandex.ru (I.V.M.).

\* Correspondence: veselova75@rambler.ru; Tel.; +7(917)3423941

**Supplementary Table S1.** Primers used for qPCR

| Genes           | GenBank Accession number | Sequence (5'-3')        |                        |
|-----------------|--------------------------|-------------------------|------------------------|
|                 |                          | Forward Primers         | Reverse Primer         |
| <i>TaRLI</i>    | AY059462                 | TTGAGCAACTCATGGACCAG    | GCTTTCCAAGGCACAAACAT   |
| <i>TaLOX</i>    | AK333416                 | CGAGAAGATGGTGATGGAGATG  | GACACAGCCAAGAGACTAGAA  |
| <i>TaACS1</i>   | U35779                   | GAGGTTGTGAACGAGCTAGAAG  | CTCGAAACCCTGCAAGAGATAG |
| <i>TaPR1</i>    | KF196278                 | ATAACCTCGGCGTCTTCATC    | GCTTATTACGGCATTCCTTTT  |
| <i>TaPR2</i>    | DQ090946                 | GCGTGAAGGTGGTGATTT      | GTGCCC GTTACACTTGGAT   |
| <i>TaPR3</i>    | AB029936                 | ACCTCCTTGGCGTCAGCT      | TCGCACCATTATTCCTT      |
| <i>TaPR6</i>    | EU293132                 | GGGCCCTGCAAGAAGTACTG    | ACACGCATAGGCACGATGAC   |
| <i>TaICS</i>    | NR175979                 | TTCTTAGAGCGTGTGGCATAG   | CAGTGTGAGGTGGCCTATT    |
| <i>TaNCED</i>   | KP099105                 | CCTGCTGCCTCTTCTGCT      | ACCAAGTGCTCTTCCGTCTC   |
| <i>TaWRKY13</i> | EF397614                 | GAGGAGGAACATGAGCAGAAG   | GAACCACCCGAAGTCGAAG    |
| <i>TaPIE1</i>   | EF583940                 | ACACATGCCGACGAATCTAC    | CCGAGTTCAAACCCAAATTCAC |
| <i>TaABI5</i>   | KX002271                 | CGTGAAGTTCTCTGAGGAAGAAG | GTCAGCGCGAAGATGGAATA   |
| <i>TaEIL1</i>   | KU03083                  | GGCTCAACAACCTGGATTTT    | CCCTGTCCAAAGAAACCCT    |

**Supplementary Table S2.** Primers used for qPCR

| Genes         | GenBank Accession<br>number | Sequence (5'-3')        |                         |
|---------------|-----------------------------|-------------------------|-------------------------|
|               |                             | Forward Primers         | Reverse Primer          |
| <i>TaRLI</i>  | AY059462                    | TTGAGCAACTCATGGACCAG    | GCTTTCCAAGGCACAAACAT    |
| <i>TaAGO1</i> | JQ805149                    | ATCAGCCTCCAGTTACCTTTG   | GCAGTATGTTCCCGCTTCTAT   |
| <i>TaAGO2</i> | KY794780                    | CTTTCATCGGCTGTTGCTTATG  | GAACGAACTCTGACACGGAATA  |
| <i>TaAGO4</i> | JQ805150                    | CTCCAGGCACTGTTGTAGATAAT | AGTGTGTTGGCCTTGTAGTC    |
| <i>TaAGO5</i> | AK447406                    | GAGTCACCATCCTGGAACATG   | GTAACCTCTCCAGCACTCTAATC |
| <i>TaDCL2</i> | KY794782                    | CGAATCGTCGAACTGGAGAAT   | ATCCTCGTAGTGGCAAATGG    |
| <i>TaDCL4</i> | KY794783                    | CTTCACTGGGTGGGAATAGATG  | GGTGTGGTTCGTGAGAGATAAA  |

**Supplementary Table S3.** Primers used for qPCR

| Genes      | GenBank Accession number | Sequence (5'-3')               |
|------------|--------------------------|--------------------------------|
| RTQAdp     |                          | CTCTGACGAGAACTTGACTTCACTATGACT |
| Ta5S-rRNA  | XR_006485435             | GGATGCGATCATACCAGCACT          |
| Ta miR156  | MF540049                 | TGACAGAAGAGAGTGAGCACA          |
| Ta miR159b | MF540051                 | TTGGATTGAAGGGAGCTCTG           |
| Ta miR160  | MF540052                 | TGCCAGGCTCCCTGTATGCCA          |
| Ta miR164  | MF540053                 | TGGAGAAGCAGGGCACGTGCA          |
| Ta miR166a | AK454189                 | TCGGACCAGGCTTCATTCC            |
| Ta miR393  | XM_044543780             | TTCCGAAAGGGATCGCATTG           |
| Ta miR396d | XM_044476889             | TCCACTGGCTTTCTTGAAGT           |
| Ta miR398  | MF540067                 | GCTAGTGTTCAGGTCGCC             |
| Ta miR408  | MF540069                 | CTGCACTGCCTCTCCCTGGC           |
